# Supplementary figures and images for: Neglect, Abuse, and Adaptive Functioning: Food Security and Housing Stability as Protective Factors for Adolescents
Source: MDPI journal article supplement (doi:10.3390/children9030390), 2022-03-10

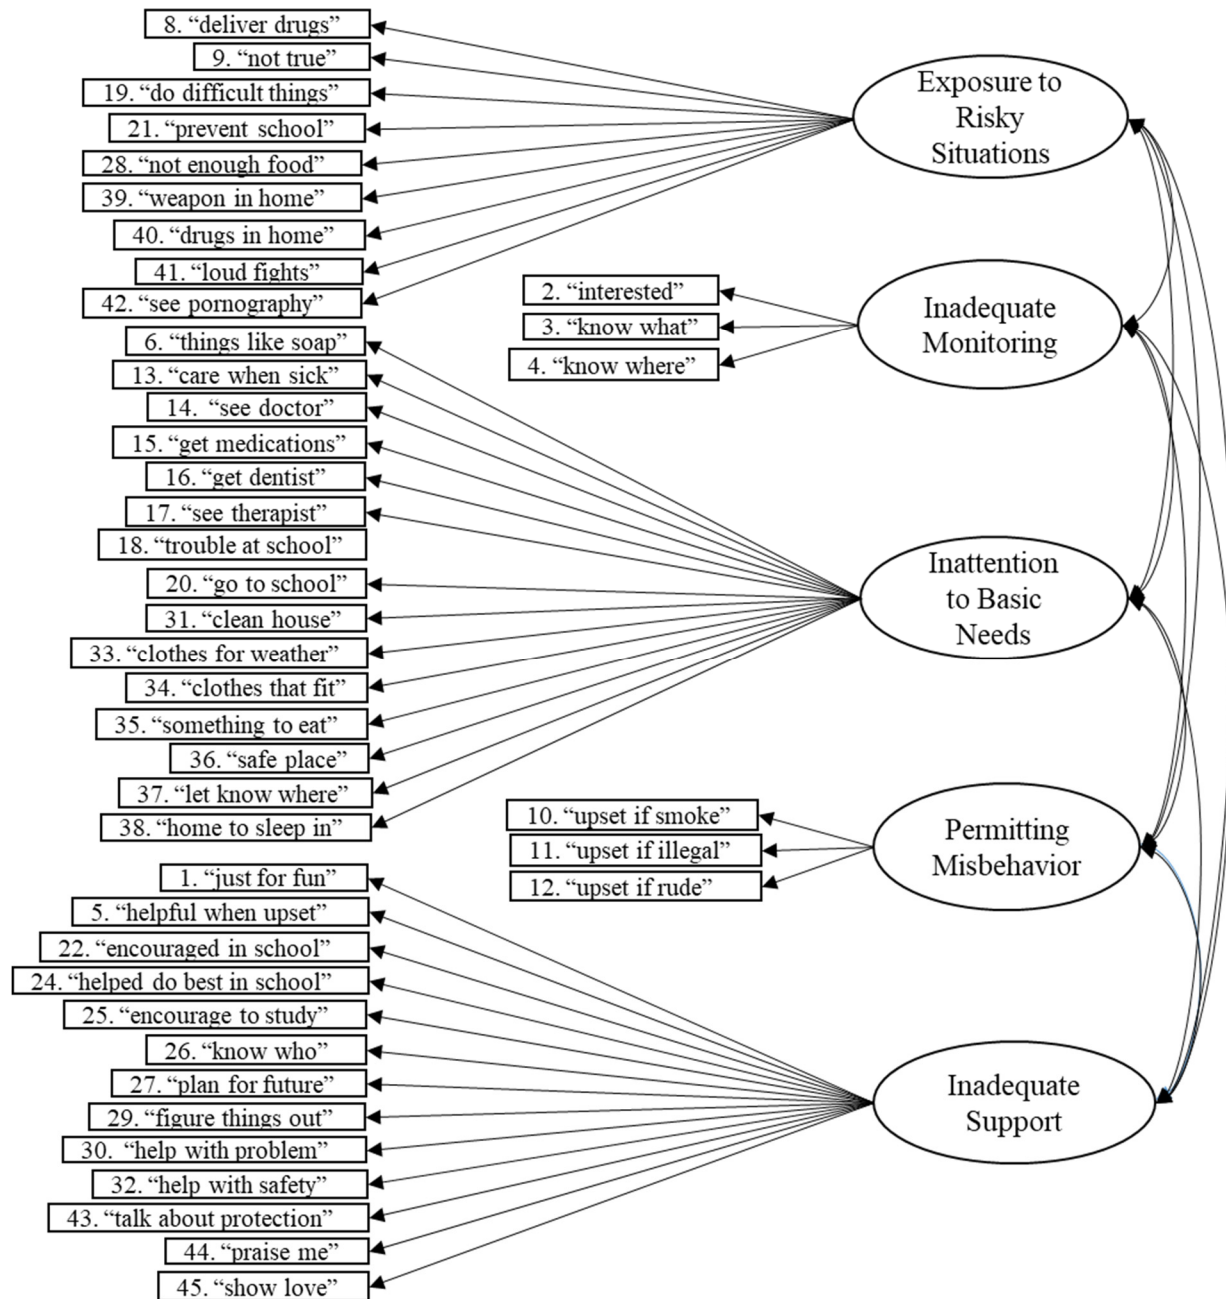

Figure S1: Measurement Model for Mid-adolescent Neglect

Supplement: s1 [file s1]
